# Supplementary material
Source: Springer Nature journal article supplement (https://www.springermedizin.de/resource/supplementary/12865_2013_539_MOESM4_ESM.pdf/9428166)

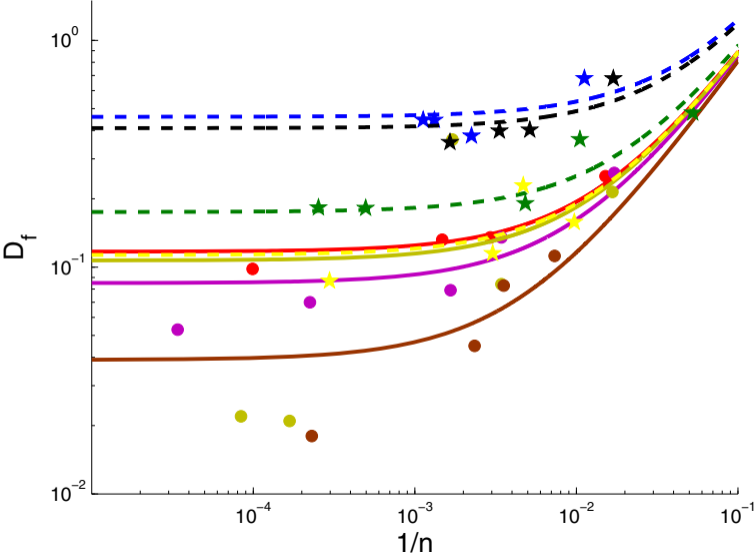

Supplement: MOESM4 [file 9428166]
